# Sensitivity enhancement and selection are shared mechanisms for spatial and feature-based attention

Daniel Birman<sup>1\*</sup> and Justin L. Gardner<sup>1</sup>

<sup>1</sup>Department of Psychology, Stanford University, Stanford, CA 94305, USA

\*Corresponding author: [danbirman@gmail.com](mailto:danbirman@gmail.com)

January 27, 2021

## Abstract

Human observers use cues to guide visual attention to the most behaviorally relevant parts of the visual world. Cues are often separated into two forms: those that rely on spatial location and those that use features, such as motion or color. These forms of cueing are known to rely on different populations of neurons. Despite these differences in neural implementation, attention may rely on shared computational principles, enhancing and selecting sensory representations in a similar manner for all types of cues. Here we examine whether evidence for shared computational mechanisms can be obtained from how attentional cues enhance performance in estimation tasks. In our tasks, observers were cued either by spatial location or feature to two of four dot patches. They then estimated the color or motion direction of one of the cued patches, or averaged them. In all cases we found that cueing improved performance. We decomposed the effects of the cues on behavior into model parameters that separated sensitivity enhancement from sensory selection and found that both were important to explain improved performance. We found that a model which shared parameters across forms of cueing was favored by our analysis, suggesting that observers have equal sensitivity and likelihood of making selection errors whether cued by location or feature. Our perceptual data support theories in which a shared computational mechanism is re-used by all forms of attention.

## Significance Statement

Cues about important features or locations in visual space are similar from the perspective of visual cortex, both allow relevant sensory representations to be enhanced while irrelevant ones can be ignored. Here we studied these attentional cues in an estimation task designed to separate different computational mechanisms of attention. Despite cueing observers in three different ways, to spatial locations, colors, or motion directions, we found that all cues led to similar perceptual improvements. Our results provide behavioral evidence supporting the idea that all forms of attention can be reconciled as a single repeated computational motif, re-implemented by the brain in different neural architectures for many different visual features.

## 1 Introduction

2 The visual world presents human observers with an overload of sensory information, only part of which is relevant  
3 to behavioral goals at any given moment in time. Observers manage this complexity by prioritizing specific aspects  
4 of vision, such as basic features or spatial locations. These forms of attention can be operationalized by providing  
5 observers with cues about the relevance of location (Cohen & Maunsell, 2011), color (Jehee, Brady, & Tong,  
6 2011), direction of motion (Huk & Heeger, 2000; Saenz, Buracas, & Boynton, 2002; Serences & Boynton, 2007),  
7 orientation (Rossi & Paradiso, 1995; Cohen & Maunsell, 2011) or object category (Harel, Kravitz, & Baker, 2014)  
8 among others. These cues improve response times (Eriksen & Hoffman, 1972; Posner, Snyder, & Davidson,  
9 1980) as well as the ability of observers to detect and discriminate visual stimuli (Carrasco, 2011). Spatial and  
10 feature-based attention rely on different kinds of cues and must have their effects on different populations of  
11 neurons tuned to these visual properties. While the effects of spatial cues are local (Alvarez & Cavanagh, 2005;  
12 Cohen & Maunsell, 2011) the effects of featural ones spread across the entire visual field (Saenz et al., 2002;  
13 Saenz, Buraças, & Boynton, 2003; Serences & Boynton, 2007; Treue & Martinez-Trujillo, 1999; Jehee et al.,  
14 2011; Störmer, Cohen, & Alvarez, 2019; Liu & Mance, 2011; Cohen & Maunsell, 2011). The effects of both forms  
15 of cueing also appear to combine in an additive manner (Hayden & Gallant, 2009; Treue & Martinez-Trujillo,  
16 1999; White, Rolfs, & Carrasco, 2015; Andersen, Fuchs, & Müller, 2011) with small differences in timing (Liu,  
17 Stevens, & Carrasco, 2007; Hayden & Gallant, 2005), further evidence that they operate in parallel.

18 Despite having their effects on different neural populations, spatial and feature-based attention may share a com-  
19 putational mechanism, thus providing a unified view of how different cue types enhance behavioral performance.  
20 Computational mechanisms of attention can be split into two general categories by whether they act to enhance  
21 sensory representations (Treue & Martinez-Trujillo, 1999; Luck, Chelazzi, Hillyard, & Desimone, 1997; Mitchell,  
22 Sundberg, & Reynolds, 2007; Itthipuripat, Cha, Byers, & Serences, 2017; Noudoost, Chang, Steinmetz, & Moore,  
23 2010; Eckstein, Peterson, Pham, & Droll, 2009; Müller et al., 2006) or select and reinforce the transmission of  
24 attended features through the visual system (Desimone & Duncan, 1995; Briggs, Mangun, & Usrey, 2013; Fries,  
25 Reynolds, Rorie, & Desimone, 2001; Pestilli, Carrasco, Heeger, & Gardner, 2011; Birman & Gardner, 2019; Lee,  
26 Itti, Koch, & Braun, 1999; Pelli, 1985; Palmer, Verghese, & Pavel, 2000; Hara & Gardner, 2014). Whether  
27 spatial or featural cues use either of these mechanisms has been studied in a variety of psychophysical tasks. For  
28 example, using a masking paradigm Baldassi and Verghese (2005) showed that the effects of spatial and featural  
29 cueing are selective for properties of the mask that are congruent with the cue and suggest a model with shared  
30 mechanisms of sensitivity enhancement. Paltoglou and Neri (2012) used a psychophysical white noise paradigm  
31 and showed a similar set of results, where gain changes explained the effects of both cue types. However, Ling,

32 Liu, and Carrasco (2009) showed using an external noise paradigm that the effects of spatial and feature-based  
33 attention do differ, but only under conditions of high noise. This finding suggests that feature and space differ in  
34 their sensitivity to irrelevant sensory information. These various findings might be reconciled by recognizing that  
35 the effects of attention differ under conditions of low and high competition. White et al. (2015) showed that the  
36 behavioral effects of spatial and feature-based cues are additive under conditions of low competition but subject  
37 to a non-linear selection effect at high competition, consistent with a two-step process of independent sensitivity  
38 enhancement followed by a selection mechanism. However, this has not been directly tested behaviorally because  
39 existing paradigms (using masking, reverse-correlation, or external noise) did not explicitly model sensitivity and  
40 selection.

41 Here we used a cued estimation task and modeling to test whether spatial and feature-based cues share an  
42 implementation through a combination of sensitivity enhancement and sensory selection. To do this, the form of  
43 cueing must be manipulated without a change in task or stimulus. We therefore developed a set of tasks in which  
44 cueing by location, color, and motion could be directly compared on shared metrics. We found that observers were  
45 able to use all forms of cues with similar efficacy. When broken down into sensitivity enhancement and sensory  
46 selection we found that both mechanisms played a role for spatial and feature-based cues and that a model with  
47 shared parameters for all cue types was preferred over one with separate parameters for each cue. Our results  
48 suggest that spatial and feature-based attention are more similar than different and support theories of a shared  
49 top-down computational mechanism (Treue & Martinez-Trujillo, 1999; Ni & Maunsell, 2019; Maunsell & Treue,  
50 2006).

## 51 Results

52 To measure the effect of cueing by feature or location on perceptual sensitivity we asked observers to perform a  
53 cued motion direction averaging task (Fig. 1). Briefly, observers were asked to report the average motion direction  
54 of two out of four random dot patches. The two selected patches were cued either by their common location or  
55 color, randomly interleaved across trials. This task thus engages either spatial or feature-based attention according  
56 to the current cue. In addition, the task does not require working memory, which avoids potential confounds  
57 introduced by storing perceptual information during a delay.

58 By examining known stimulus manipulations we first showed that our task provided a good measure of perceptual  
59 sensitivity. As expected, we found that estimates of average direction were more precise on easier trials. This  
60 was true both for trials with a smaller angle difference between the two cued patches (Fig. 2a) and for trials

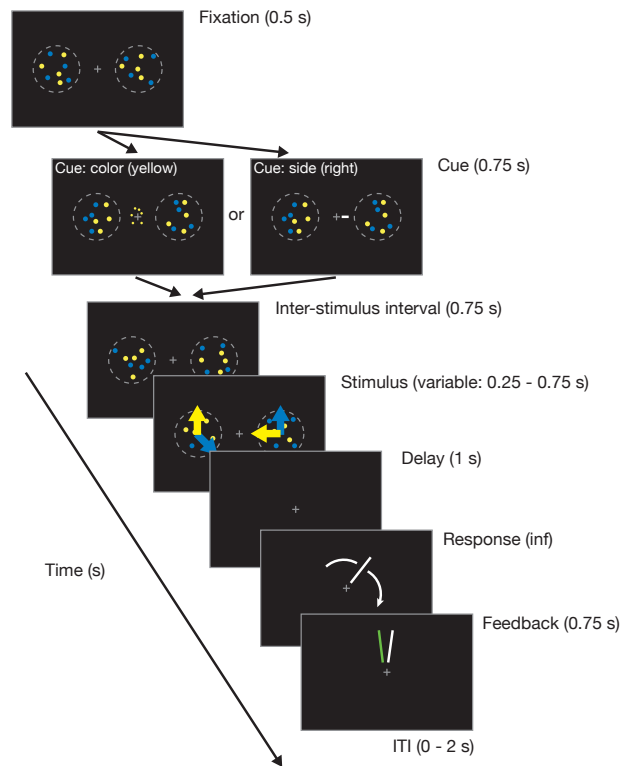

Figure 1: Motion direction averaging task. Observers were asked to select two out of four random dot patches and average their directions of motion. Observers initiated trials by fixating a central cross (Fixation). During this initial period and until stimulus presentation the dots in the four patches moved incoherently. A cue was shown at the fixation cross indicating which two dot patches should be averaged (Cue): a line to the left or right of fixation indicated selection by side or a mini-patch of dots colored yellow or blue indicated selection by feature. After a brief delay (Inter-stimulus interval) the four dot patches moved coherently in random directions for a variable duration (Stimulus). After another brief delay (Delay) observers used a rotating wheel to report the *average* direction of motion for the two dot patches they were asked to select. Feedback was given by indicating the true average motion direction.

61 with longer duration (Fig. 2b). To quantify this, we fit a model of perceptual sensitivity in estimation tasks (the  
62 “target confusability competition” model, see Schurgin, Wixted, and Brady (2020) and Methods) which fits a  
63 parameter  $d'$  in a manner analogous to signal detection. Increasing the stimulus duration from a mean of 0.35 s  
64 to 0.625 s made the task easier and increased the average  $d'$  across observers from 1.53 to 1.77 (+0.24 95% CI  
65 [0.17, 0.30]). Reducing the angle between the two dot patches from a mean of  $100^\circ$  to  $30^\circ$  also made the task  
66 easier, increasing the average  $d'$  from 1.48 to 1.84 (+0.36 95% CI [0.28, 0.43]).

67 Having validated our perceptual sensitivity measure, we next tested whether performance was better for spatial  
68 or feature-based cues and found that spatial cues provided only a modest benefit to performance (Fig. 2c).  
69 Estimates of average direction were more accurate when observers selected dot patches by their common spatial  
70 location (on the left or right) compared to by feature (yellow or blue). The  $d'$  across observers was 1.72, 95%  
71 CI [1.51, 2.05] for selection by side and 1.52 [1.33, 1.69] for selection by color. This modest increase in  $d'$  was  
72 found for 6/7 observers, averaging 0.19 [0.08, 0.43]. Splitting  $d'$  out by all four selection conditions: select yellow,  
73 select blue, select left, and select right,  $d' = 1.60$  [1.41, 1.73], 1.48 [1.30, 1.69], 1.73 [1.48, 1.98], and 1.75 [1.52,  
74 2.20], respectively. Our data therefore show that changing the form of cueing has an almost negligible effect on  
75 averaging. The small advantage of spatial cueing that we did observe may in fact be explained by the known  
76 effect of stimulus distance on the accuracy of averaging (see e.g. Maule and Franklin (2015) among others).

77 Although the performance difference between spatial and color cues was small, the mechanism by which subjects  
78 used the cue could have been quite different. For example, cues could have improved performance by making  
79 perception more precise, or performance could also have improved if observers became more accurate in selecting  
80 the cued dot patches. These two different ways of improving performance, enhancing sensitivity and reducing  
81 selection errors, both could have resulted in similar response distributions. We next set out to separate these two  
82 computational mechanisms.

83 To separate changes in sensitivity from selection we devised a cued estimation task using the same stimulus as  
84 the cued averaging task (Fig. 3). In the estimation task, observers reported the properties of only a single dot  
85 patch. The advantage of this change is that a computational model can be used to separate the effects of a  
86 change in sensitivity from a change in selection. If an observer's response is close to the angle of the target dot  
87 patch, then it is likely that the observer correctly selected the target and reported it back. If their response is  
88 instead close to the angle of one of the other dot patches, there is some likelihood that the observer made a  
89 mistake and mis-selected a non-target patch, i.e. an error in selection. This task allowed us to decompose these  
90 different possible explanations into model parameters fit to large numbers of trials.

91 We tested our hypothesis on two variations of the cued estimation task to ensure our results were robust to the

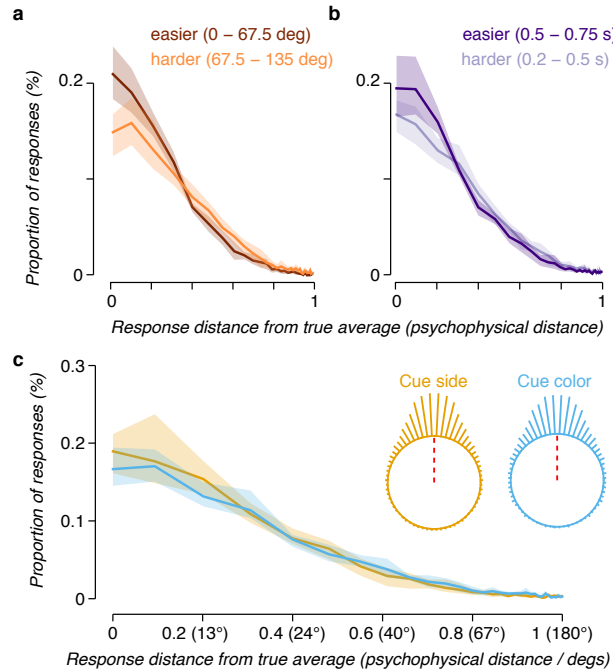

Figure 2: Estimation error during the averaging task. (a) A histogram displaying the proportion of responses at each absolute distance from the true average motion direction (rotated to 0) is shown, averaged across observers. Data are split by the angular distance between the motion direction of the two dot patches which were cued. Note that the x-axis in all panels has been re-scaled from degrees to psychophysical distance, see Methods. (b) Conventions as in (a), data are split by the duration of the stimulus. (c) Conventions as in previous panels. Selection by spatial location (i.e. averaging the two patches on the right or left) is shown in yellow, and selection by color (i.e. averaging the two yellow or blue patches) is shown in blue. The two inset plots show the same histogram in a circular space, with a red dashed line indicating the true average. In all panels lines indicate the average normalized histogram of response counts across observers and shaded regions the 95% confidence interval.

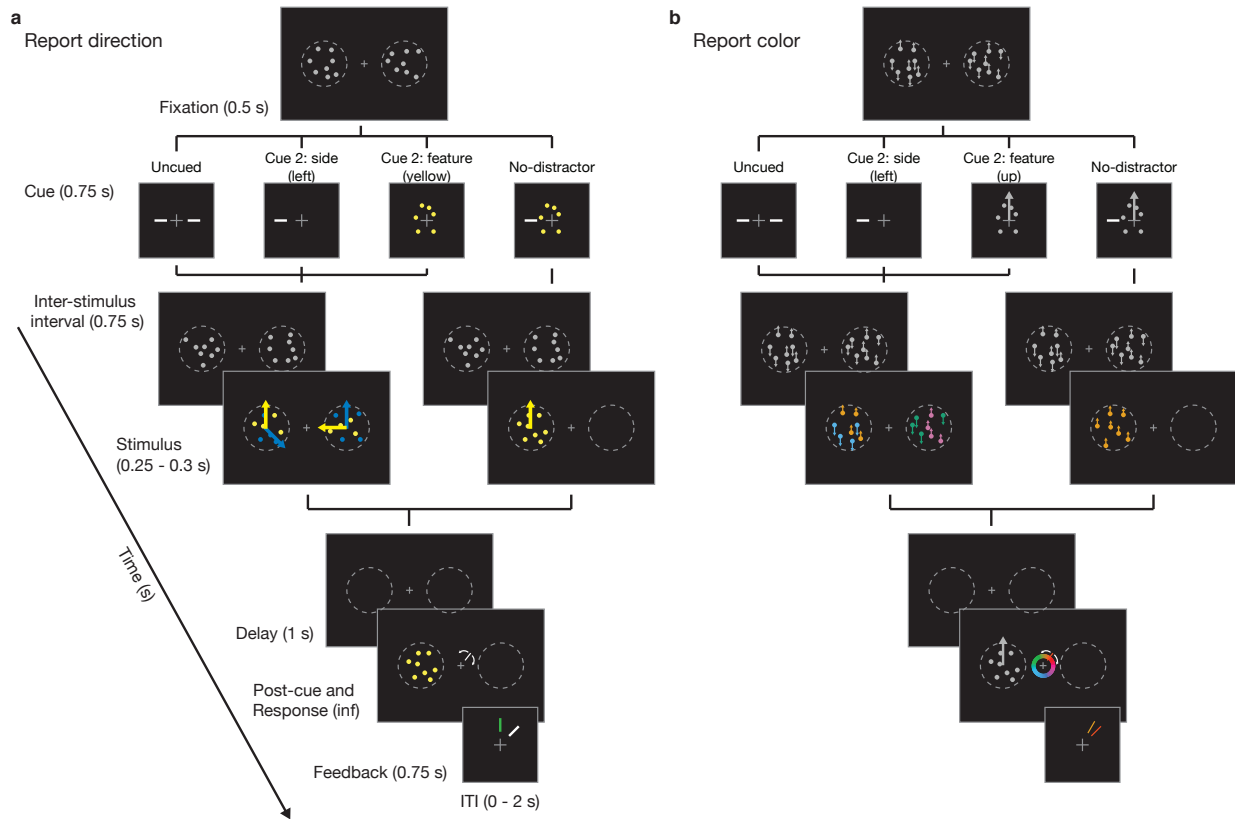

Figure 3: Estimation task. (a) Observers began each trial by fixating a central cross (Fixation). A pre-cue (Cue) was then shown at fixation to indicate to observers which of the four dot patches they should select. A brief delay (Inter-stimulus interval) followed. Up to this point all four dot patches were colored white and moving incoherently. The dots then became colored and coherent for a variable duration (Stimulus). After another brief delay (Delay), observers were shown a second cue which was used to disambiguate the target stimulus (Post-cue). For example, if the observer was cued to remember the two stimuli on the left, the post-cue could be yellow to indicate that of the two patches that were cued (blue and yellow, left side) only the motion direction of the target (the yellow patch on the left) should be reported. Observers were given unlimited time to respond (Response) and received feedback before the next trial (Feedback). (b) A second variant of the same task was also run in which the cues were side (left or right) or motion direction (up or down) and observers reported about the color of the dot patches.



92 particular cued features. In one variant observers were cued by location or color and had to report the motion  
93 direction of a dot patch (Fig. 3a). In the other, observers were cued by location or motion direction while  
94 reporting color (Fig. 3b).

95 We first evaluated the cued estimation task on two reference conditions: trials in which no cue was given and  
96 trials where no distractors were shown. These two references provide a lower bound (Uncued condition, Fig. 3)  
97 and an upper bound (No-distractor, Fig. 3) on performance. The no-distractor condition is an upper bound  
98 because the stimulus to report appears in the absence of distracting information. This should be equivalent to  
99 the optimal performance of an observer cued to select a single dot patch.

100 The reference conditions showed that observers could perform this task and that indeed, the absence of distractors  
101 improved estimates of motion direction. In both variations the observers' estimates were less precise in the  
102 uncued condition (black markers have a wider distribution compared to grey markers, Fig. 5), indicating poorer  
103 performance. We next decomposed these responses into the separate sensitivity and selection parameters to  
104 understand what caused the deteriorated performance in the presence of distractors.

105 To decompose the responses in the cued estimation task we extended an existing observer model (Schurgin et al.,  
106 2020) to fit separate parameters to capture sensitivity ( $d'$ ) and selection ( $\beta$ ) (Fig. 4). On each trial, the observer  
107 model encodes the four stimulus patches (Fig. 4a,b) by a set of noisy channels (Fig. 4c). A parameter,  $d'$ ,  
108 controls the maximum value of the channels and the sensitivity of the observer (Fig. 4d). In this model, the  
109 channel with the maximum response "wins" and becomes the observer's estimated angle for that dot patch (red  
110 dashed line, Fig. 4e). The reported angle is then sampled from the estimated angles for the four dot patches  
111 in proportion to the  $\beta$  parameters (Fig. 4f,g). By computing the probability of each channel winning we can  
112 generate the full response likelihood for each dot patch (color distributions, Fig. 4e), i.e. how likely the observer  
113 was to make a particular response having seen that patch. When weighted by the  $\beta$  parameters, which fit the  
114 probability of choosing to report each patch, we get the distribution of response likelihoods for that trial, given  
115 all stimuli (Fig. 4h). Thus, in our model the  $\beta$  parameters control how selection occurs while the  $d'$  parameter  
116 controls the observer's precision of report.

117 We first confirmed that the model captured the perceptual sensitivity of the observers in the two reference  
118 conditions. The model accounted for the qualitative aspects of the data well (curves track the markers, Fig.  
119 5a,b). For the report-color task the average  $R^2_{pseudo}$  over observers was 0.84, 95% CI [0.71, 0.90] (uncued  
120 reference) and 0.88 [0.85, 0.91] (no-distractor reference). For the report-direction task 0.85 [0.74, 0.89], and  
121 0.90 [0.88, 0.92], respectively. We also confirmed that every model we fit was a better fit to the true data than  
122 a data set in which we permuted the response array. Averaged over the two task variations the improvement in

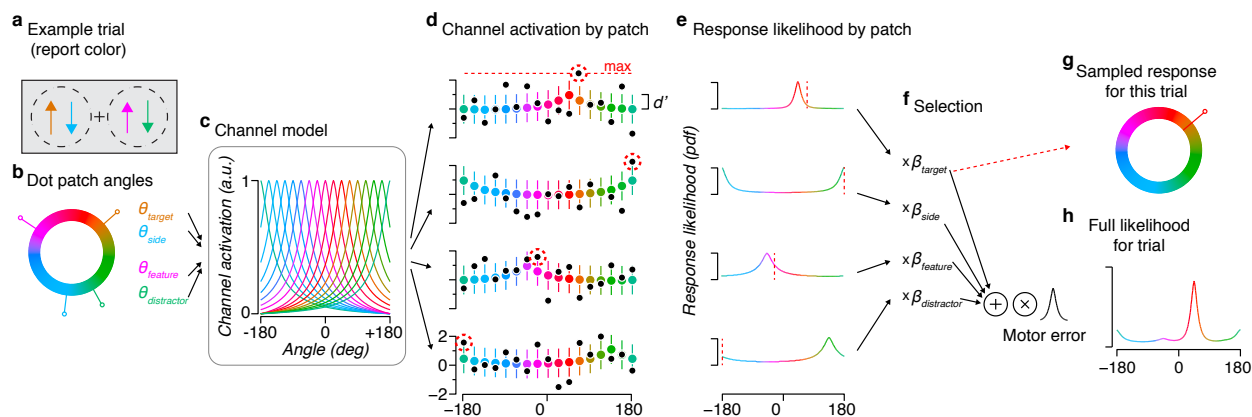

Figure 4: Estimation task model. (a-c) On a trial, stimuli of varying angles are encoded by many independent channels (each channel is represented by a single colored tuning curve). Each channel's tuning profile is defined by the psychophysical distance function (see Methods) relative to that channel's preferred angle. (d) The channel responses for a trial are noisy, so for a particular presented stimulus each channel will have a response sampled (black markers) from a normal distribution with a mean set by the height of the tuning curve at the stimulus angle (colored markers indicate mean and error bars  $\pm 1$  standard deviation). The model's predicted response to a dot patch is found by taking the channel with the maximum sampled response and reporting its preferred angle. These winning angles are shown as a red vertical dashed line in (e) along with the probability distribution of each channel having the maximum response. A free parameter  $d'$  sets the spread of this distribution by multiplicative scaling of the peak responses of the channels, in a manner analogous to signal detection (see Methods). (f) The selection parameters ( $\beta$ ) control the probability that each dot patch will influence an observer's report. (g) From a discrete sampling perspective, the  $\beta$  values sets the proportion of trials where the observer will report about the estimated angles of particular dot patches, e.g. here the estimated target angle is reported. (h) To fit the model we computed the full likelihood distribution for each trial. We then optimized the model parameters to maximize the likelihood of each observer's actual reports across all trials.

123 cross-validated log-likelihood for real data compared to the permuted data was 39.01, [26.43, 56.74] (uncued)  
124 and 98.60, [84.31, 115.08] (no-distractor).

125 Looking at the sensitivity parameter we found that without distractors observers consistently made more precise  
126 reports (Fig. 5c). The average  $d'$  across observers for no-distractor trials in the report-direction task 2.21 [1.91,  
127 2.46] and the report-color task was 2.05 [1.88, 2.35]. By comparison, in the presence of distractors  $d'$  was only  
128 0.79 [0.58, 1.02] for the report-direction task and 1.28 [0.95, 1.49] for report-color. These differences show that  
129 adding distractors to the scene caused observers to recall the color or motion direction of a single dot patch with  
130 far more estimation error.

131 We also found that uncued responses were characterized by a large proportion of selection errors (all Uncued  $\beta$   
132 values non-zero, Fig. 5d). This indicates that the presence of distractors not only reduced the accuracy of reports  
133 but caused observers to report about the incorrect patches. In the report-direction task 44% of reports were about  
134 the wrong dot patch, most often the dot patch on the same side but of the wrong color (33% [28, 38]), but also  
135 often about the feature-matched patch on the wrong side (8% [2, 17]). In the report-color task observers made  
136 35% of reports about the wrong dot patch. Most often about the patch on the same side (19% [12, 31]) but  
137 sometimes about the feature matched patch (6% [1, 12]) or the distractor (10% [4, 19]). In summary, adding  
138 distractors decreased the precision of estimates and caused observers to report about the entirely wrong dot patch  
139 for about one in every three trials.

140 Returning to the main hypothesis, we next looked at whether the cued trials caused a change in sensitivity or  
141 selection when compared to baseline performance. In the cued trials, observers selected dot patches by their  
142 common spatial location (left or right) or common feature (yellow/blue color, or up/down motion for the two task  
143 variants, respectively) (Fig. 3). Although cued to two dot patches, observers still reported only the properties of a  
144 single dot patch at the end of each trial, uniquely identified by the post-cue. As expected, we found performance  
145 on these trials to be intermediate between the reference conditions (Fig. 6a,b). Again, we confirmed that the  
146 model fits explained a substantial portion of the variance, finding an  $R^2_{pseudo}$  of 0.90 [0.86, 0.93], 0.89 [0.88,  
147 0.91] for the report-direction variant and 0.91 [0.88, 0.92] (spatial cued), 0.87 [0.80, 0.92] for the report-color  
148 variant. We also confirmed that the models far exceeded the fit to permuted data sets, with an average increase  
149 in cross-validated likelihood of 231.49, [162.04, 315.85].

150 Although both the uncued and cued trials had distractors present, we found that cueing reduced the impact of  
151 the distractors, both improving sensitivity and reducing selection errors. To quantify this, we combined trials from  
152 the two cued conditions and looked at the values of  $d'$  (Fig. 6c) and  $\beta$  (Fig. 6d). Cueing, by spatial location or  
153 feature, increased  $d'$  in both task variants (Fig. 6c). This increase was modest, the uncued  $d'$  was 0.93 [0.79,

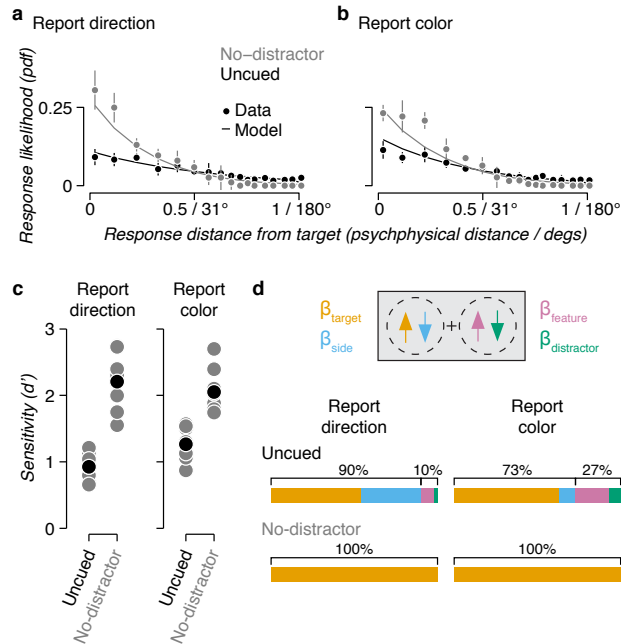

Figure 5: Baseline estimation performance. (a) A histogram of observer responses, relative to the true target motion direction is shown averaged across observers for the uncued and no-distractor conditions. Markers indicate the mean and error bars the 95% confidence intervals. Lines are the average fit of the model. (b) As in (a) for the report-color variant. (c) The  $d'$  parameter is shown for individual observers (gray) and the average (black) for each condition and task variant. (d) The  $\beta$  parameters are shown averaged across observers for each condition and task variant.  $\beta_{target}$  refers to the dot patch which was post-cued (here left side, moving up),  $\beta_{side}$  is the patch on the same side as the post-cued patch (left side, moving down),  $\beta_{feature}$  is the patch on the other side with the matched feature (right side, moving up), and  $\beta_{distractor}$  is the patch on the other side with a mis-matched feature (right side, moving down).

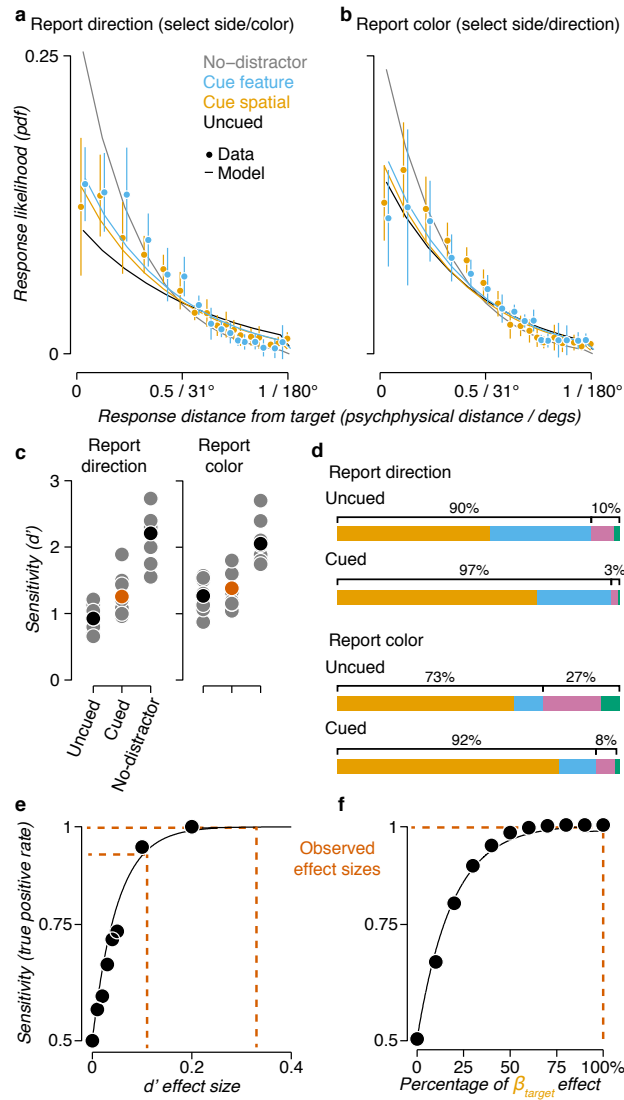

Figure 6: Comparison of spatial and feature-based cueing. (a) A histogram of observer responses, relative to the true target motion direction, is shown averaged across observers. Markers indicate the mean and error bars the 95% confidence interval. Estimates are split by whether the pre-cue indicated a feature (Cue feature, blue) or a spatial location (Cue spatial, yellow). (b) As in (a) for the report color variant. (c) The value of the  $d'$  parameter is shown for the cued data collapsed across the two cues, compared to the uncued and no-distractor conditions. (d) The value of the  $\beta$  parameters are shown for the cued data, again collapsed across the two cues. Refer to Figure 5d for legend. (e) Results of a power analysis simulation for the  $d'$  parameter. Markers indicate actual simulated datasets and the line is the fit of an exponential function. Red dashed lines indicate the effect sizes reported in the paper. (f) As in (e), for the results of a power analysis of the  $\beta$  parameter. Note that the x-axis represents the percent difference between the  $\beta_{target}^{cued}$  and  $\beta_{target}^{uncued}$ , so the reported effect size is 100%.

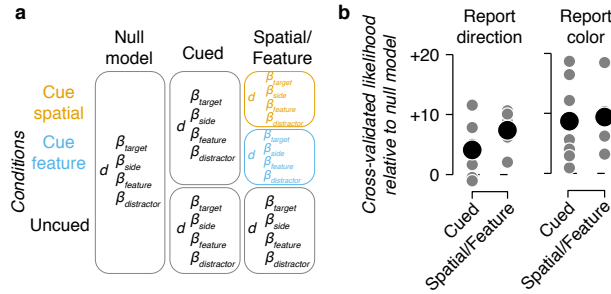

Figure 7: Spatial and feature-based cueing share model parameters (a) Diagram showing how parameters were fit for the three models we compared. Each row are the trials for the two cued conditions and the uncued condition. Each column shows how parameters were fit to the different sets of data. (b) The relative cross-validated likelihood of the Cued and Spatial/Feature model are shown compared to the Shared model for individual observers (grey markers) and the average (black marker). Some markers are hidden by others.

1.05] and 1.27 [1.10, 1.44] for the report-direction and report-color variants, respectively. In the cued model these were 1.26 [1.09, 1.51] and 1.38 [1.21, 1.62]. Taking the uncued condition as a baseline and the no-distractor condition as ceiling, this improved sensitivity corresponds to 23.4% and 17.5% of the no-distractor increase. We found that a model with separate  $d'$  parameters for cued and uncued trials better accounted for our data compared to a model which combined these trial types: the average increase in cross-validated likelihood was 2.82 [0.82, 5.06] for report-direction and 6.70 [3.52, 11.73] for report-color. We also observed substantial reduction in errors of selection. Comparing uncued to cued, observers increased their selection of the target dot patch by 15% [9, 23] and reduced incorrect selection of the same-side by 7% [-14, -1], same-feature by 6% [-12, -2], and distractor by 2% [-7, 3] for the report color variant. For the report direction variant we found that observers increased target selection by 18% [8, 25], same-side decreased by 6% [-17, 2], same-feature by 3% [-9, 0] and distractor by 9% [-18, -3]. Again, we found that a model with separate  $\beta$  parameters for cued and uncued trials better accounted for our data: the average increase in cross-validated likelihood was 2.89 [0.10, 5.74] for report-direction and 4.84 [1.15, 10.20] for report-color. These data show that cueing has a substantial impact on performance in this task, improving sensitivity and reducing the probability that observers will misreport about the irrelevant dot patches.

Because the change in  $d'$  and  $\beta$  that we observed were small we performed a model recovery simulation to confirm that our dataset was sufficient to detect these effects with high power (Fig. 6e,f). Briefly, we simulated data sets with various  $d'$  and  $\beta$  parameters using the range of values observed in the cued and uncued conditions (Fig. 6c,d). We generated 200 such data sets for every combination of parameters and fit these with our analysis pipeline. We then bootstrapped the resulting values to compute the model's true positive rate (sensitivity), i.e. the probability that the model would recover a difference in  $d'$  or  $\beta$  when a real difference was simulated with noise (see Methods: Model recovery for details). We found that the effects we observed were well within the range that we would expect to be able to detect (observed effect sizes are all above 90% sensitivity, Fig. 6e,f).

176 While the averaging task data showed that human observers could use spatial and featural cues with similar  
177 efficacy, this could be done by similar or different computational mechanisms. Testing this hypothesis by fitting  
178 our model with either shared or separate parameters for the Uncued, Cue spatial, and Cue feature conditions  
179 (Fig. 7a), revealed that spatial and featural cues employ a shared computational mechanism. We first fit a Null  
180 model which used the same parameters for all three conditions, testing the null hypothesis that cueing had no  
181 effect. We then compared this to a Cued model which separated the spatial and feature cueing conditions from  
182 the uncued condition (the parameters from this model are reported in Fig. 6c,d). Finally, we fit a model in which  
183 all three conditions had separate parameters. We found that separately fitting cued trials improved model fit (Fig.  
184 7b), but there was no additional improvement to fitting spatial and feature-based conditions separately. Adding  
185 separate cued parameters increased the cross-validated likelihood by 4.11 [1.14, 7.34] and 8.69 [4.17, 13.93] for  
186 report direction and color, respectively. Further separating spatial and feature-based trials did not further improve  
187 the fits: change in average cross-validated likelihood 3.28 [-0.49, 6.21] and 0.71 [-2.22, 7.50]. Note that real, but  
188 small, differences between spatial and feature cueing would be unlikely to have been detected at our power (i.e.  
189 a difference in  $d' < 0.05$  or  $\beta < 0.01$  Fig. 6e,f). In summary, because the improvements in perceptual sensitivity  
190 and reduction in selection errors were shared between cueing by location, color, and motion direction, our results  
191 suggest that spatial and feature-based selection share a common computational mechanism that both enhances  
192 sensitivity and reduces errors of selection.

## 193 Discussion

194 We found that spatial and feature-based cues changed perception in similar ways across a set of cued estimation  
195 tasks. In one task observers averaged motion directions cued either by location or color, a perceptual judgment  
196 with low working memory load. We found that observers were able to use both cues with similar efficacy, suggesting  
197 that they had similar effects on sensitivity. Although this measurement put each cue on the same scale it did not  
198 demonstrate computational similarity: observers might, for example, use sensory enhancement more when cued to  
199 a spatial location. We designed a set of tasks to separate sensitivity enhancement from errors of selection through  
200 the use of estimation (Prinzmetal, Nwachuku, Bodanski, Blumenfeld, & Shimizu, 1997; Prinzmetal, Amiri, Allen,  
201 & Edwards, 1998) and a computational model. Our data showed that all cues improved perceptual sensitivity  
202 and reduced errors of selection. Model comparison revealed that a model with shared parameters for spatial and  
203 feature-based cues was preferred over models in which perceptual improvements were separated by cue type. In  
204 other words, in our experiments the exact nature of the cue, whether spatial location, color, or motion direction,  
205 did not change the effects.

206 Several previous studies have also looked at how perceptual data inform us about the mechanisms of spatial and  
207 feature-based attention. Although many of these studies used different tasks or stimuli between cueing conditions  
208 we can nevertheless make indirect comparisons about the underlying computational mechanisms. For example,  
209 Ling et al. (2009) asked observers to judge motion directions under varying amounts of noise. They showed that  
210 at low noise both spatial and featural cues improved performance, but only featural cues improved performance  
211 in the presence of high external noise. The low noise comparison confirms that sensitivity enhancement is shared  
212 between different forms of cueing (Martinez-Trujillo & Treue, 2004; Cohen & Maunsell, 2011). Although the  
213 authors reported differences between cues under high noise conditions, this may be the result of using the same  
214 feature dimension for cue, report, and noise. Observers were cued to a motion direction, then reported whether  
215 a stimulus was rotated relative to the cue under conditions of decreasing motion coherence. In general, changes  
216 in tuning functions reappear whenever feature-based cues are matched with the dimension of report (Ling et al.,  
217 2009; Paltoglou & Neri, 2012; Baldassi & Verghese, 2005) while gain combined with a sensory selection step,  
218 as we propose, is sufficient to explain attentional effects cued by orthogonal features (White et al., 2015; Ni &  
219 Maunsell, 2019) such as those in our tasks.

220 In another comparison, Baldassi and Verghese (2005) measured perceptual thresholds for oriented stimuli in the  
221 presence of masks. These masks varied in their distance and similarity to the target, defining a set of tuning  
222 functions. They found that an exogenous location cue at the target improved perception regardless of the mask  
223 distance or difference from the target, while exogenous orientation cues only provided a benefit when the mask  
224 was close to or similar to the detected orientation. Their data and ours are consistent with models in which tuned  
225 filters increase their precision according to their similarity to the cue (Treue & Martinez-Trujillo, 1999). Their  
226 data also points to the possibility that exogenous cueing relies on a different set of mechanisms that may be  
227 specific to spatial cues (Busse, Katzner, & Treue, 2006; Donovan, Zhou, & Carrasco, 2020).

228 Several previous studies used task designs in which a direct comparison was possible. In one, Liu et al. (2007)  
229 looked for differences in timing between spatial and featural cueing. They found a small advantage to spatial  
230 cueing when the cue preceded the stimulus by 0.2 s, with both forms of cueing becoming equivalent at a 0.5 s  
231 delay. This result suggests that spatial attention can be deployed faster than featural attention (Goddard, Carlson,  
232 & Woolgar, 2019), a finding that explains in part why spatial attention is sometimes considered “primary” over  
233 featural attention (Wolfe, 1994). We interpret the faster deployment of spatial attention in the same way the  
234 authors do, as a difference in the neural architecture of top-down attentional control. Timing differences alone  
235 are insufficient to suggest that computational differences exist between spatial and featural attention. Because  
236 the performance enhancement of cueing is otherwise identical, both our results and theirs support the possibility  
237 of similar computational mechanisms.



238 Another direct comparison was performed by White et al. (2015). The authors looked for evidence of independent  
239 mechanisms by examining whether location cues and featural cues combine in an additive manner. In a low-  
240 competition condition they found that cues combined in a manner consistent with two independent additive  
241 mechanisms. In a high competition condition they found that a second selection step was necessary to explain  
242 the effects of combined cues. They perform this step in their model by divisive normalization. Our model used  
243 proportional sampling as a way to approximate these more complex biophysical mechanisms, but the end result  
244 is the same: there is a winner-take-all effect in which the stronger cued responses are more likely to out-compete  
245 weaker uncued ones.

246 In the cued estimation task we used a post-cue to reveal the target in each trial. This afforded us the flexibility  
247 to cue different dimensions of the stimuli while still allowing us to measure an observer's knowledge about any  
248 of the stimuli on the screen, providing us with the data necessary to separate sensitivity from selection. To  
249 avoid observers treating cued and uncued targets differently (Rahnev et al., 2011) we chose not to include invalid  
250 targets, i.e. we never asked the observers to report about a dot patch that was not part of the pre-cued set.  
251 One consequence of this is that we don't know how much information observers retained about stimuli in the  
252 absence of attention. Many previous reports about dual task performance (Lee et al., 1999; Reddy, Wilken, &  
253 Koch, 2004; Lee, Koch, & Braun, 1997) and unattended stimuli (Li, VanRullen, Koch, & Perona, 2002; Birman  
254 & Gardner, 2019) show that visual information is processed and retained even at low levels or in the absence of  
255 attention. What our design did allow us to measure was that errors of selection decrease with attention. This  
256 is consistent with models in which some stimuli are prioritized for processing over others (Baldassi & Verghese,  
257 2005; Ling et al., 2009; White et al., 2015) but does not preclude the possibility that information is retained  
258 about all stimuli.

259 One alternative to our model is that observers might encode an "ensemble" representation of the stimulus  
260 (Utochkin & Brady, 2020) instead of encoding the four dot patches independently and sampling from them  
261 (Emrich & Ferber, 2012; Bays, Catalao, & Husain, 2009; Bays, Wu, & Husain, 2011). Some researchers have  
262 shown evidence for ensemble representations by measuring bias toward the mean of large sets of stimuli (Utochkin  
263 & Brady, 2020; Brady & Alvarez, 2011). In the task used by Utochkin and Brady (2020) stimulus angles are  
264 sampled from a distribution with an informative mean, making an ensemble representation an optimal strategy.  
265 The mean angle in our task was uninformative across trials, even though on a small number of trials with clustered  
266 stimuli it could have provided useful information. This key difference, if recognized by observers, likely played a  
267 role in which strategy they used to solve each task. In addition, our model represents the ensemble statistics in  
268 an implicit manner because of how the channels encode the stimuli. To see this, consider Figure 4 for a trial with  
269 four dot patches of similar color. The channel responses would all peak at nearby values, causing an ensemble-like

270 effect in which the mean angle becomes more likely to be reported than any individual dot patches' true color  
271 angle. We expect that this behavior in the model should account for the effect reported by Utochkin and Brady  
272 (2020), but an ideal comparison could be performed by designing a stimulus set in which the ensemble is either  
273 informative or uninformative across different blocks of trials.

274 Our results are consistent with a single shared computational mechanism of attention implemented by a different  
275 neural architecture depending on the feature (Cohen & Maunsell, 2011). This view is supported by the similarity of  
276 neural effects for different forms of attention (Cohen & Maunsell, 2011; Treue & Martinez-Trujillo, 1999; Patzwahl  
277 & Treue, 2009; Ling, Jehee, & Pestilli, 2015; Jehee et al., 2011; Martinez-Trujillo & Treue, 2004), the additive or  
278 multiplicative advantage of combining multiple cues (Hayden & Gallant, 2009; White et al., 2015; Andersen et al.,  
279 2011; Goddard et al., 2019), and the similar top-down sources in prefrontal cortex from which attention signals are  
280 thought to originate (Corbetta & Shulman, 2002; Moore & Armstrong, 2003; Zhou & Desimone, 2011; Bichot,  
281 Xu, Ghadooshahy, Williams, & Desimone, 2019; Liu & Hou, 2013). From this perspective, spatial location is just  
282 another feature and spatial attention is a special form of feature-based attention (Treue & Martinez-Trujillo, 1999).  
283 Like color or motion direction, location is a dimension in the possible space of stimulus properties and neuron  
284 tuning. Although all features are treated identically in most ways, the topological representation of space in early  
285 visual cortex leads to one important difference: any local computation, e.g. response normalization (Carandini &  
286 Heeger, 2011), will have spatially-tuned effects. Consistent with this, Ni and Maunsell (2019) recently showed  
287 that the neural effects of different cue types are consistent with a common top-down mechanism combined with  
288 spatial response normalization.

289 A common mechanism combined with normalization predicts that the shift in spatial attention in our task, between  
290 selecting two overlapped dot patches or two separated patches, will lead to a change in the pool of activity that  
291 drives normalization early in visual cortex. Changes in the relative size of stimuli and the normalization pool  
292 are known to affect performance for low level features such as contrast discrimination (Herrmann, Montaser-  
293 Kouhsari, Carrasco, & Heeger, 2010). Other work has shown that for overlapping stimuli, as in our design,  
294 contrast normalization in early visual cortex leads to a biased representation of lower-level features but this bias  
295 does not occur for higher-level features such as motion direction (Wiesner, Baumgart, & Huang, 2020). This  
296 is consistent with our results, where we showed no difference in performance despite a change in the size of  
297 the normalization pool (from two dot patches for spatial cues to four for featural cues) and confirms that the  
298 representations of higher-level features are not affected by spatial normalization in the same manner as low-level  
299 ones.

300 Researchers studying visual search have long held that visual features are extracted and processed in a parallel

301 step where spatial information is prioritized (Treisman & Gelade, 1980; Wolfe, 1994). Physiology experiments,  
302 in turn, have gone on to separate the neural effects of spatial and feature cues using different tasks. Because  
303 of these operational differences, many studies have found that spatial and featural cues have unique behavioral  
304 and neural properties—while a parallel literature of computational models (Treue & Martinez-Trujillo, 1999; Ni  
305 & Maunsell, 2019) has shown that all forms of cueing can be reconciled. The similar behavioral effects of cueing  
306 location, direction of motion, and color in our experiments demonstrate that perceptual data also provide support  
307 for a single shared mechanism of attention.

## 308 **Methods**

### 309 **Observers**

310 In total 16 observers were subjects for the experiments (9 female, 7 male, mean age 25 y, range 19 - 37). All  
311 observers except one (who was an author) were naïve to the intent of the experiments. Three observers were  
312 excluded during the initial training sessions and one after data collection due to an inability to maintain appropriate  
313 fixation (see eye-tracking below). Potential observers were not considered for inclusion in the study if they self-  
314 reported any anomaly of color vision (e.g. color-blindness). At the start of the experiment observers completed  
315 the Ishihara test for color vision (Ishihara, 1987) and one observer was excluded due to anomalous responses.  
316 Observers wore lenses to correct vision to normal if needed. Procedures were approved in advance by the Stanford  
317 Institutional Review Board on human participants research and all observers gave prior written informed consent  
318 before participating.

319 Seven of the observers completed the estimation task, performing on average 1428 trials (range 880 - 2123) in  
320 two to four 60 minute sessions. Seven of the observers performed the averaging task, completing on average 1010  
321 trials (range 280 - 1475) in two to four 90 minute sessions. One observer participated in both tasks. Observers  
322 were trained for one hour on their first day and then performed at most two sessions on subsequent days, returning  
323 several times to complete the experiment.

### 324 **Hardware setup for stimulus and task control**

325 Visual stimuli were generated using MATLAB (The Mathworks, Inc.) and MGL (Gardner, Merriam, Schluppeck,  
326 & Larsson, 2018). Stimuli were displayed on a 22.5 inch VIEWPixx LCD display (resolution of 1900x1200,

327 refresh-rate of 120 Hz) at a 60 cm viewing distance. Output luminance and spectral luminance distributions were  
328 measured for the LCD display with a PR650 spectrometer (Photo Research, Inc.). The gamma table for the  
329 display was adjusted to linearize the output luminance separately for each color channel. The luminance spectra  
330 of the monitor was used to compute a transformation matrix from the CIELAB color space to the RGB output of  
331 the screen, such that the  $a^*$  and  $b^*$  dimensions could be separately manipulated without changing the luminance  
332 ( $L^*$ ) (C.I.E., 1978). Experiments were performed in a darkened room where extraneous sources of light were  
333 minimized. Observers used a rotating response device to provide their responses (Powermate USB, Griffin Audio).

### 334 **Eye tracking**

335 Eye-tracking was performed using an infrared video-based eye-tracker at 500 Hz (Eyelink 1000; SR Research).  
336 Calibration was performed at the start of each session to get a validation accuracy of less than 1 degree average  
337 offset from expected, using a thirteen-point calibration procedure. Calibrations were repeated as needed after  
338 breaks. During training, trials were initiated by fixating the central cross for 0.5 s and canceled on-line when an  
339 observer's eye position moved more than 1.5 degree away from the center of the fixation cross for more than 0.3  
340 s. Observers were excluded prior to data collection if we were unable to calibrate the eye tracker to an error of  
341 less than 1 degree of visual angle or if their canceled trial rate did not drop to near zero. During data collection  
342 the online cancellation was disabled and trials were excluded if observers made saccades outside of fixation ( $>$   
343 1.5deg) during the stimulus period.

### 344 **Experimental design**

345 Stimuli for both the averaging and estimation task consisted of two pairs of overlapped dot patches, to the left  
346 and right of a central fixation cross ( $0.5 \times 0.5$  deg). The dot patches were circular regions centered 8 degrees  
347 eccentric with a diameter of 10 deg, covering from  $\pm 3$  to  $\pm 13$  deg along the horizontal axis and  $\pm 5$  deg along  
348 the vertical axis. Each circular region contained two dot patches which differed in color and motion direction.  
349 Dots within a patch (0.3 deg diameter, 0.2 dots / deg<sup>2</sup>) were given an identical color and moved in the same  
350 direction at 3.5 deg / s. Each dot had a lifetime of 0.25 s, before being redrawn at a new random location. In  
351 the averaging task one patch on each side was colored yellow and one blue (90 deg and 270 deg, in  $a^*$   $b^*$  space,  
352 with  $L^* = 60$ ).

### 353 **Averaging task**

354 On each trial in the averaging task observers were asked to report the average motion direction of two dot patches  
355 (Fig. 1). Before stimulus presentation a cue indicated to observers the features they would use to select the two  
356 dot patches. There were two ways that observers were instructed to select these dot patches out of the four on the  
357 screen: they could either be the two on the same side (left/right) or the two with the same color (yellow/blue).  
358 Observers were instructed at the beginning of each block of 20 trials about which form of selection would be  
359 cued, by the phrase “cue side” or “cue color”. In cue-side blocks, a line to the left or right directed observers to  
360 average the two dot patches on the corresponding side. In cue-color blocks, a miniature patch (0.2 dots / deg<sup>2</sup>,  
361 0.1 deg diameter) of yellow or blue colored dots directed them to average those patches. The cues thus uniquely  
362 identified the pair of dot patches that the observer needed to select and report. Each trial was initiated by the  
363 observer fixating the central cross for 0.5 s. This was followed by the 0.75 s cue. After a 0.75 s delay the stimulus  
364 was shown.

365 During the stimulus the four dot patches moved coherently in random directions. The two cued patches were  
366 constrained to move in directions that were less than 135 degrees apart. This avoids response confusion because  
367 for two patches that are 180 degrees apart there are two possible responses. Observers were shown the stimulus for  
368 0.25 - 0.75 s (randomly sampled from a uniform distribution), then allowed unlimited time to rotate the response  
369 wheel and click it to make a response. Response direction was indicated by a small line, which rotated as the  
370 observer turned the wheel. Feedback was given by showing the actual average motion direction (small green line,  
371 Fig. 1). Each trial was followed by a brief inter-trial interval (0 - 2 s, uniformly distributed).

### 372 **Estimation task**

373 On each trial in the estimation task observers were asked to report about either the color or motion direction of a  
374 single dot patch (Fig. 3). Before each block of 40 trials, observers were told which feature would be reported with  
375 either the phrase “report color” or “report direction” appearing on the screen. On each side during report-direction  
376 blocks one dot patch was colored blue and the other yellow and all four dot patches moved in random directions  
377 (0 to 359 deg, uniformly distributed). During report-color blocks the stimulus properties were inverted. On each  
378 side one dot patch moved upwards and the other downwards and the four dot patches were colored using angles  
379 in  $L^*a^*b^*$  space ( $L^* = 60$ ,  $a^* = \cos \theta$ ,  $b^* = \sin \theta$ ,  $\theta$  sampled from 0 to 359 deg, uniformly distributed).

380 Before stimulus presentation a pre-cue indicated to observers the features of the target patch or gave no infor-  
381 mation, depending on the type of trial. There were two ways that observers were instructed to select dot patches

382 out of the four on the screen: they could either be the two on the same side (left or right) or the two with the  
383 same feature (yellow or blue in cue-color blocks, up or down in cue-direction blocks).

384 These pre-cues were the same as in the averaging task, either lines (cueing left or right) or patches of dots (cueing  
385 either color or motion direction). The pre-cues were blocked, so that the same cue type was repeated for twenty  
386 trials (i.e. cue side trials repeated, sampled randomly between cue left and cue right). A post-cue always indicated  
387 the specific patch that needed to be reported. Each trial consisted of the following sequence (Fig. 3): a fixation  
388 period (0.5 s), a pre-cue (0.75 s), an inter-stimulus interval (0.75 s), stimulus presentation (0.25 or 0.3 s), a  
389 delay (1 s), a post-cue resolving which dot patch should be reported (0.75 s) and then unlimited time to report  
390 a response. The inter-trial interval was 0 - 2 s, uniformly distributed. The stimulus duration (0.25-0.3 s) was  
391 chosen based on the averaging task to make the estimation task difficult for participants.

392 We also included uncued and no-distractor conditions as references. Comparing cued to uncued trials let us test for  
393 improved performance due to cueing, while trials without distractors gave us a measurement of the performance  
394 ceiling. In the uncued condition (Uncued, Fig. 3) observers were shown an uninformative pre-cue, then shown a  
395 post-cue which resolved which dot patch should be reported. In the no-distractor condition only the target patch  
396 was shown and observers reproduced the color or motion direction without interference. These control conditions  
397 were otherwise identical in timing to the regular trials and were also blocked in twenty trial sets. In total, 30%  
398 of trials were cue side, 30% cue feature, 20% uncued, 10% no-distractor, and an unused condition accounted for  
399 the last 10%.

## 400 **Statistical Analyses**

### 401 **Psychophysical distance**

402 We designed our analyses to avoid conflating poor sensitivity with high lapse rates by converting angular to  
403 psychophysical distance (Schurgin et al., 2020). When observers estimate motion direction or color in angular  
404 space, including in our data, they often make a large number of responses far from the target angle. At first  
405 glance, these appear to be guesses on lapse trials (Zhang & Luck, 2008). Previous work has demonstrated that  
406 instead observers are making these low-probability responses with high confidence (Schurgin et al., 2020; Bays,  
407 2014). This result is consistent with a continuous view of working memory (Ma, Husain, & Bays, 2014; Taylor  
408 & Bays, 2020) and can be explained by recognizing that observers are not encoding angles in degree space but  
409 in an unknown internal representation. In this representation, which we refer to as psychophysical space, angular  
410 distances that are far apart or very similar are compressed. We approximate this with a sigmoidal function:

$$p(\theta) = \alpha \frac{\theta^\kappa}{\theta^\kappa + \gamma^\kappa} \quad (1)$$

411 This equation transforms an angular distance  $\theta$  to the normalized psychophysical distance  $p(\theta)$ , measured in  
412 perceptual units. The free parameters controlling the shape ( $\alpha = 1.1$ ,  $\kappa = 1.5$ , and  $\gamma = 35$ ) were set according  
413 to data available in Schurgin et al. (2020) and the results are robust to small changes (on the order of 20%) in  
414 the parameters.

415 The parameters set above imply that an observer perceives the difference between  $p = 0$  and  $p = 0.5$  ( $x = 0$  and  
416  $x = 31$  deg, respectively) as equal to the difference between  $p = 0.5$  and  $p = 1$  ( $x = 31$  and  $x = 180$  deg). In  
417 this way, the psychophysical space is approximately a log compression of the original degree space.

#### 418 **Averaging task analysis**

419 To quantify the observer accuracy in the averaging task we fit a simple model of perceptual sensitivity for angular  
420 estimation tasks, the “target confusability competition” model (Schurgin et al., 2020). In the following sections  
421 we will build up this model of observer behavior.

422 The model takes into account two aspects of sensory representations to predict observer behavior. First, the model  
423 takes into account the “confusability” of stimuli by transforming angular distances into psychophysical distance  
424 (Eq. 1). In a second step, noisy internal channels tuned according to the psychophysical distance independently  
425 “compete” to represent a stimulus in a manner analogous to signal detection (Fig. 4a). On each trial the model  
426 proceeds according to the following steps.

427 First, the stimulus angles are encoded by the channels. The tuning profile of each channel takes the form of the  
428 normalized psychophysical distance function (Eq. 1). An example from the estimation task is shown in Figure 4.  
429 For a single trial with four dot patches (Fig. 4a) of varying color ( $\theta_{target}$ ,  $\theta_{side}$ ,  $\theta_{feature}$ , and  $\theta_{distractor}$ , Fig. 4b)  
430 a small set of channels (Fig. 4c) would be activated as in Figure 4d. The mean activation and range of noise are  
431 shown (colored markers and error bars) as well as examples of samples from those distributions (black markers).  
432 We use 100 channels in the full model, but the exact number of channels is an arbitrary hyperparameter. More  
433 channels provide better resolution to account for the data, up to some ceiling. In simulations we found that more  
434 than 100 provided a marginal benefit because correlations quickly accumulate in nearby channels.

435 Each channel’s response (Fig. 4d) is normally distributed around the mean ( $\mu$ ) determined from the tuning profile  
436 with standard deviation ( $\sigma$ ) set to one:

$$C_{\theta_{pref}}(\theta) = \mathcal{N}(\mu = d' \times (1 - p(\theta - \theta_{pref})), \sigma = 1) \quad (2)$$

437 Where  $\theta_{pref}$  is the preferred orientation for that channel,  $p$  is the function described in Eq. 1, and  $d'$  controls the  
438 maximum amplitude of the response.

439 Next, we take the channel with the maximum response. The preferred orientation of this channel is the angle  
440 reported by the modeled observer (Fig. 4d). Because each channel has independent normally-distributed noise,  
441 the probability of any channel being reported can be computed as the conditional probability of that channel  
442 exceeding all of the other channels (Fig. 4e). We approximate this distribution by numerically integrating over  
443 channel responses  $a$ :

$$P(\theta|\theta_{stimulus}) = \int_{-m}^m P(C_{\theta}(\theta_{stimulus}) = a) \prod_{j \neq \theta} P(C_j(\theta_{stimulus}) < a) da \quad (3)$$

444 This equation computes the probability that channel  $C_{\theta}$ 's response will exceed all the other channels and be chosen  
445 as the observer's response, given that they observed a dot patch with angle  $\theta_{stimulus}$ .  $a$  indexes the response of  
446 the channels according to Eq. 2. To compute the likelihood distribution across all angles we numerically evaluate  
447 Eq. 3 for each channel. We evaluate  $a$  in the range  $m = \pm \frac{5}{d}$  based on simulations which showed that this range  
448 was more than sufficient to capture the range of channel response values, but still be computationally tractable.  
449 The likelihood distributions are normalized as probability density functions, such that:

$$\sum_i P(\theta_i|\theta_{stimulus}) = 1 \quad (4)$$

450 A free parameter  $d'$  controls the maximum amplitude of the channel responses (Fig. 4d) and therefore the width  
451 of the likelihood distributions.

452 This model behaves in a manner analogous to signal detection. In the simplified case of a 2-AFC task the entire  
453 model simplifies to signal detection. In such a task, an observer might be looking for a dot patch moving at  
454 an angle  $\theta = 0$ . On each trial two items would be presented: for example, one dot patch moving in the target  
455 direction  $\theta = 0$  and a second in the opposite direction  $\theta = 180$ , or  $p(\theta) = 0$  and  $p(\theta) = 1$ , respectively. The  
456 channel corresponding to the target direction,  $C_0$  would then have a response sampled from a normal distribution  
457 according to the response to each dot patch. If  $d' = 1$  these would be  $C_0(0) = \mathcal{N}(\mu = d' = 1, \sigma = 1)$  and



458  $C_0(1) = \mathcal{N}(\mu = 0, \sigma = 1)$ . In this simplified scenario with only a single channel the  $d'$  parameter is equivalent  
459 to signal detection:  $d' = \frac{\mu_{signal} - \mu_{noise}}{\sigma}$ , since it scales the distance between two normal distributions with  
460  $\sigma = 1$ . The full model has 100 channels that are correlated to each other (due to the tuning functions), but the  
461 analogous behavior to signal detection holds.

462 For the averaging task we fit  $d'$  to the responses of individual observers by maximizing the likelihood of the  
463 observed data using Bayesian adaptive direct search (Acerbi & Ma, 2017). Note that the  $\beta$  parameters are used  
464 to fit the estimation task. For the averaging task we simply set  $\beta_{target} = 1$  and the others to 0. We cross-validated  
465 the models by separating the data into ten folds using nine to fit the model and evaluating the likelihood on the  
466 left out fold. We repeated this leave-one-fold-out procedure to obtain the likelihood of the full dataset.

467 To account for motor error we convolved the likelihood functions (Eqn. 3) with an additional  $2^\circ$  full-width half  
468 maximum normal distribution (Fig. 4f). We also tested models with  $1$  and  $3^\circ$  distributions to ensure the results  
469 were robust to this parameter.

#### 470 Estimation task analysis

471 To understand how observers encoded the stimulus during the estimation task, we expanded the model to separate  
472 sensitivity (how precise an observer's reports were) from errors of selection (how likely observers were to report  
473 about the target or an erroneous patch). The estimation task model generalizes the averaging task model to  
474 account for the presence of four stimuli, allowing all four to modify an observer's reports.

475 To model the observer's trial-by-trial response, we assumed that four likelihood distributions (one for each of the  
476 four dot patches) were sampled according to different probabilities. The dot patches shared a sensitivity parameter  
477 ( $d'$ , Fig. 4d). We then modeled responses as probabilistic samples from the four distributions according to a set  
478 of bias ( $\beta$ ) parameters:

$$P(\theta|\theta_{target}, \theta_{side}, \theta_{feature}, \theta_{distractor}) = \beta_{target}P(\theta|\theta_{target}) + \beta_{side}P(\theta|\theta_{side}) + \beta_{feature}P(\theta|\theta_{feature}) + \beta_{distractor}P(\theta|\theta_{distractor}) \quad (5)$$

479  $P$  refers to the probability distribution (Eq. 3) where  $\theta$  are the possible response angles and the subscripted  $\theta$   
480 parameters are the angle of each dot patch (either motion direction or angle in color space). The subscript terms

481 *target*, *side*, *feature*, and *distractor* correspond to the dot patch that was post-cued on the trial (orange), the  
482 patch on the same side (blue), the patch on the opposite-side with matched-feature (pink), and the patch on the  
483 opposite-side with mismatched-feature (green), respectively (Inset panel, top right, Fig. 4a,b).

484 The actual bias ( $\beta$ ) values were calculated from three intermediate values:

$$\beta_{target} = \beta_s * \beta_f \quad (6)$$

$$\beta_{side} = \beta_s * (1 - \beta_f) \quad (7)$$

$$\beta_{feature} = (1 - \beta_s) * (1 - \beta_d) \quad (8)$$

$$\beta_{distractor} = (1 - \beta_s) * \beta_d \quad (9)$$

485 These are computed in a simple hierarchy: first  $\beta_s$  controls whether the correct side is sampled. Second, the  
486 parameters  $\beta_f$  and  $\beta_d$  determine whether the patch with the feature matching the target or the distractor is  
487 sampled. We constrained  $\beta_s$ ,  $\beta_f$ , and  $\beta_d$  to the range  $[0, 1]$ , which then also constrains  $\beta_{target} + \beta_{side} +$   
488  $\beta_{feature} + \beta_{distractor} = 1$ . In this way, the fit value of  $\beta_{target}$  will correspond to the proportion of trials in  
489 which an observer's response angle could be best attributed as having come from the target dot patch.  $\beta_{side}$  will  
490 correspond to the proportion of trials attributed to the dot patch on the same side as the target, and similarly for  
491  $\beta_{feature}$  and  $\beta_{distractor}$ .

492 The output of this model is then a full likelihood distribution (Fig. 4h), i.e. the probability that any given angle  
493 will be chosen as a response given the condition and stimulus (Eqn. 5).

494 In sum, we fit one sensitivity parameter ( $d'$ ) and three intermediate bias parameters ( $\beta_s, \beta_f, \beta_d$ ) for the data set  
495 in which each observer selected by location or color (and reported motion direction) and separately for the data  
496 set in which they selected by location or motion direction (and reported color). Each model thus fit four free  
497 parameters using approximately 700 trials of data.

## 498 **Model statistics**

499 To compare any two variants of the models we computed their cross-validated log-likelihood ratio (i.e., the  
500 difference in total log-likelihood). We use this statistic rather than other information criteria (e.g. Akaike infor-  
501 mation criterion (Akaike, 1987)) because the cross-validation procedure already penalizes models with additional

502 parameters for over-fitting.

503 To evaluate the quality of model fits for the estimation task we computed a measure of variance explained. We  
504 binned the proportion of responses at equal degree intervals (32 bins, 11.25° each) generating a distribution of  
505 response angles and compared these to the model's predicted distribution using the formula:

$$R_{pseudo}^2 = 1 - \frac{SS_{res}}{SS_{total}} \quad (10)$$

506 Where  $SS_{res}$  and  $SS_{total}$  are the unexplained variance and total variance, computed from the proportion of  
507 responses  $y$  and the model predictions  $y'$ :

$$SS_{res} = \sum_i (y'_i - y_i)^2 \quad (11)$$

$$SS_{total} = \sum_i y_i^2 \quad (12)$$

508 To obtain a measure of statistical significance we randomly permuted the responses made by each observer within  
509 their data and refit the models, then repeated this permutation procedure 100 times. After the subtracting  
510 the mean, the resulting distribution of log-likelihoods had a 95% CI of [-2.22, 2.54]. This matches the common  
511 suggestion that when an information criterion statistic differs by more than two it should be considered statistically  
512 significant, while a difference larger than 10 would indicate a substantial improvement in model fit. For all  
513 parameter comparisons we used permutation tests to compute confidence intervals on their differences.

## 514 **Model recovery**

515 To estimate the statistical power of our data set and analysis we performed a model recovery simulation. Our  
516 focus was on estimating our statistical sensitivity (i.e. true positive rate) for various effect sizes of the  $d'$  and  
517  $\beta$  parameters. To estimate the sensitivity of the  $d'$  parameter, we set up a series of simulated data sets each  
518 consisting of 700 trials (i.e. equivalent to the data of one observer, for one task variant). These datasets were  
519 constructed by sampling response angles according to the same model used to fit the data, including the addition  
520 of motor noise (Fig. 4). We simulated a  $d'$  of 1.00, 1.01, 1.02, 1.03, 1.04, 1.05, 1.10, and 1.20, consistent with  
521 the range of  $d'$  values observed in the uncued and cued data. We set  $\beta_{target} = 1$  for these data sets. For each

522  $d'$  value we generated 200 simulated data sets and fit these with our analysis pipeline. We then compared the fit  
523  $d'$  values against the distribution of values for the dataset with  $d' = 1.00$ . A hit was counted if the fit value for a  
524 simulated data set with  $d' > 1.00$  was larger than the fit value for the data with  $d' = 1.00$ . We bootstrapped the  
525 comparisons 10,000 times to estimate our sensitivity and report this (markers, Fig. 6e) relative to the observed  
526 effects. The fit of a saturating exponential function (black line) which captures the simulations well is also shown.

527 We next set up a similar test to recover the  $\beta$  parameters. We simulated data starting from the uncued  $\beta$   
528 values ( $\beta_{target} = 0.50$ ,  $\beta_{side} = 0.35$ ,  $\beta_{feature} = 0.10$ , and  $\beta_{distractor} = 0.05$ ) and going up to the cued values  
529 ( $\beta_{target} = 0.75$ ,  $\beta_{side} = 0.25$ ,  $\beta_{feature} = 0.00$ , and  $\beta_{distractor} = 0.00$ ) in 10% increments (i.e. for  $\beta_{target}$ : 0%  
530 = 0.50, 10% = .525, ..., up to 100%=0.75). Again we generated 200 simulated data sets for each combination  
531 of parameters, fit the model to each, and compared the parameters of each 10% increment against the fit to the  
532 0% data, bootstrapping these 10,000 times. We calculated the proportion of simulations in which the cued  $\beta$   
533 went in the right direction relative to the uncued  $\beta$  and report the results for the  $\beta_{target}$  parameter in Figure 6f.  
534 The other  $\beta$  parameters all shared this same sensitivity curve.

### 535 **Code and data accessibility**

536 Code and data to reproduce the analysis and figures described can be accessed with the DOI 10.17605/OSF.IO/KMBTZ.

537

### 538 **Acknowledgments**

539 We acknowledge the generous support of Research to Prevent Blindness and Lions Clubs International Foundation,  
540 and the Hellman Fellows Fund to JLG as well as the UW Vision Training Grant (NEI T32EY07031) and Washington  
541 Research Foundation Postdoctoral Fellowship to DB. We thank Lynda Ichinaga for administrative support.

542 Current affiliation of DB: Department of Biological Structure, University of Washington, Seattle, WA 98195, USA.

### 543 **Contributions**

544 Both the authors conceived of and designed research, interpreted results of experiments, edited and revised  
545 manuscript, and approved final version of manuscript. DB performed experiments, analyzed data, prepared  
546 figures, and drafted manuscript.

## 547 References

- 548 Acerbi, L. & Ma, W. J. (2017). Practical bayesian optimization for model fitting with bayesian adaptive direct  
549 search, 1836–1846.
- 550 Akaike, H. (1987). Factor analysis and AIC. *Psychometrika*, *52*(3), 317–332.
- 551 Alvarez, G. A. & Cavanagh, P. (2005). Independent resources for attentional tracking in the left and right visual  
552 hemifields. *Psychological science*, *16*(8), 637–643.
- 553 Andersen, S. K., Fuchs, S., & Müller, M. M. (2011). Effects of feature-selective and spatial attention at different  
554 stages of visual processing. *Journal of Cognitive Neuroscience*, *23*(1), 238–246.
- 555 Baldassi, S. & Verghese, P. (2005). Attention to locations and features: Different top-down modulation of detector  
556 weights. *J. Vis.* *5*(6), 556–570.
- 557 Bays, P. M. (2014). Noise in neural populations accounts for errors in working memory. *J. Neurosci.* *34*(10),  
558 3632–3645.
- 559 Bays, P. M., Catalao, R. F., & Husain, M. (2009). The precision of visual working memory is set by allocation of  
560 a shared resource. *Journal of vision*, *9*(10), 7–7.
- 561 Bays, P. M., Wu, E. Y., & Husain, M. (2011). Storage and binding of object features in visual working memory.  
562 *Neuropsychologia*, *49*(6), 1622–1631.
- 563 Bichot, N. P., Xu, R., Ghadooshahy, A., Williams, M. L., & Desimone, R. (2019). The role of prefrontal cortex in  
564 the control of feature attention in area V4. *Nat. Commun.* *10*(1), 5727.
- 565 Birman, D. & Gardner, J. L. (2019). A flexible readout mechanism of human sensory representations. *Nat.*  
566 *Commun.* *10*(1), 3500.
- 567 Brady, T. F. & Alvarez, G. A. (2011). Hierarchical encoding in visual working memory: Ensemble statistics bias  
568 memory for individual items. *Psychological science*, *22*(3), 384–392.
- 569 Briggs, F., Mangun, G. R., & Usrey, W. M. (2013). Attention enhances synaptic efficacy and the signal-to-noise  
570 ratio in neural circuits. *Nature*, *499*(7459), 476–480.
- 571 Busse, L., Katzner, S., & Treue, S. (2006). Spatial and feature-based effects of exogenous cueing on visual motion  
572 processing. *Vision research*, *46*(13), 2019–2027.
- 573 Carandini, M. & Heeger, D. J. [David J]. (2011). Normalization as a canonical neural computation. *Nat. Rev.*  
574 *Neurosci.* *13*(1), 51–62.
- 575 Carrasco, M. (2011). Visual attention: The past 25 years. *Vision Res.* *51*(13), 1484–1525.
- 576 C.I.E. (1978). Recommendations on uniform color spaces, Color-Difference equations, psychometric color terms,  
577 supplement no. 2 of publication CIE no. 15 (e-1.3. 1). Bureau Central de la CIE Paris.

- 578 Cohen, M. R. & Maunsell, J. H. R. (2011). Using neuronal populations to study the mechanisms underlying spatial  
579 and feature attention. *Neuron*, *70*(6), 1192–1204.
- 580 Corbetta, M. & Shulman, G. L. (2002). Control of goal-directed and stimulus-driven attention in the brain. *Nature*  
581 *reviews neuroscience*, *3*(3), 201–215.
- 582 Desimone, R. & Duncan, J. (1995). Neural mechanisms of selective visual attention. *Annual review of neuroscience*,  
583 *18*(1), 193–222.
- 584 Donovan, I., Zhou, Y. J., & Carrasco, M. (2020). In search of exogenous feature-based attention. *Attention*,  
585 *Perception, & Psychophysics*, *82*(1), 312–329.
- 586 Eckstein, M. P., Peterson, M. F., Pham, B. T., & Droll, J. A. (2009). Statistical decision theory to relate neurons  
587 to behavior in the study of covert visual attention. *Vision research*, *49*(10), 1097–1128.
- 588 Emrich, S. M. & Ferber, S. (2012). Competition increases binding errors in visual working memory. *Journal of*  
589 *Vision*, *12*(4), 12–12.
- 590 Eriksen, C. W. & Hoffman, J. E. (1972). Temporal and spatial characteristics of selective encoding from visual  
591 displays. *Percept. Psychophys.* *12*(2), 201–204.
- 592 Fries, P., Reynolds, J. H., Rorie, A. E., & Desimone, R. (2001). Modulation of oscillatory neuronal synchronization  
593 by selective visual attention. *Science*, *291*(5508), 1560–1563.
- 594 Gardner, J. L., Merriam, E. P., Schluppeck, D., & Larsson, J. (2018). MGL: Visual psychophysics stimuli and  
595 experimental design package. *Zenodo*.
- 596 Goddard, E., Carlson, T. A., & Woolgar, A. (2019). Spatial and feature-selective attention have distinct effects  
597 on population-level tuning. *bioRxiv*, 530352.
- 598 Hara, Y. & Gardner, J. L. (2014). Encoding of graded changes in spatial specificity of prior cues in human visual  
599 cortex. *Journal of neurophysiology*, *112*(11), 2834–2849.
- 600 Harel, A., Kravitz, D. J., & Baker, C. I. (2014). Task context impacts visual object processing differentially across  
601 the cortex. *Proc. Natl. Acad. Sci. U. S. A.* *111*(10), E962–E971.
- 602 Hayden, B. Y. & Gallant, J. L. (2005). Time course of attention reveals different mechanisms for spatial and  
603 feature-based attention in area V4. *Neuron*, *47*(5), 637–643.
- 604 Hayden, B. Y. & Gallant, J. L. (2009). Combined effects of spatial and feature-based attention on responses of  
605 V4 neurons. *Vision Res.* *49*(10), 1182–1187.
- 606 Herrmann, K., Montaser-Kouhsari, L., Carrasco, M., & Heeger, D. J. (2010). When size matters: Attention affects  
607 performance by contrast or response gain. *Nat. Neurosci.* *13*(12), 1554–1559.
- 608 Huk, A. C. & Heeger, D. J. [D J]. (2000). Task-related modulation of visual cortex. *J. Neurophysiol.* *83*(6),  
609 3525–3536.
- 610 Ishihara, S. (1987). *Test for colour-blindness*. Kanehara Tokyo, Japan.

- 611 Itthipuripat, S., Cha, K., Byers, A., & Serences, J. T. (2017). Two different mechanisms support selective attention  
612 at different phases of training. *PLoS Biol.* 15(6), e2001724.
- 613 Jehee, J. F. M., Brady, D. K., & Tong, F. (2011). Attention improves encoding of task-relevant features in the  
614 human visual cortex. *J. Neurosci.* 31(22), 8210–8219.
- 615 Lee, D. K., Itti, L., Koch, C., & Braun, J. (1999). Attention activates winner-take-all competition among visual  
616 filters. *Nature neuroscience*, 2(4), 375–381.
- 617 Lee, D. K., Koch, C., & Braun, J. (1997). Spatial vision thresholds in the near absence of attention. *Vision*  
618 *research*, 37(17), 2409–2418.
- 619 Li, F. F., VanRullen, R., Koch, C., & Perona, P. (2002). Rapid natural scene categorization in the near absence  
620 of attention. *Proc. Natl. Acad. Sci. U. S. A.* 99(14), 9596–9601.
- 621 Ling, S., Jehee, J. F. M., & Pestilli, F. (2015). A review of the mechanisms by which attentional feedback shapes  
622 visual selectivity. *Brain Struct. Funct.* 220(3), 1237–1250.
- 623 Ling, S., Liu, T., & Carrasco, M. (2009). How spatial and feature-based attention affect the gain and tuning of  
624 population responses. *Vision Res.* 49(10), 1194–1204.
- 625 Liu, T. & Hou, Y. (2013). A hierarchy of attentional priority signals in human frontoparietal cortex. *Journal of*  
626 *Neuroscience*, 33(42), 16606–16616.
- 627 Liu, T. & Mance, I. (2011). Constant spread of feature-based attention across the visual field. *Vision research*,  
628 51(1), 26–33.
- 629 Liu, T., Stevens, S. T., & Carrasco, M. (2007). Comparing the time course and efficacy of spatial and feature-based  
630 attention. *Vision Res.* 47(1), 108–113.
- 631 Luck, S. J. [S J], Chelazzi, L., Hillyard, S. A., & Desimone, R. (1997). Neural mechanisms of spatial selective  
632 attention in areas v1, v2, and V4 of macaque visual cortex. *J. Neurophysiol.* 77(1), 24–42.
- 633 Ma, W. J., Husain, M., & Bays, P. M. (2014). Changing concepts of working memory. *Nat. Neurosci.* 17(3),  
634 347–356.
- 635 Martinez-Trujillo, J. C. [Julio C] & Treue, S. [Stefan]. (2004). Feature-based attention increases the selectivity of  
636 population responses in primate visual cortex. *Current biology*, 14(9), 744–751.
- 637 Maule, J. & Franklin, A. (2015). Effects of ensemble complexity and perceptual similarity on rapid averaging of  
638 hue. *Journal of Vision*, 15(4), 6–6.
- 639 Maunsell, J. H. & Treue, S. [Stefan]. (2006). Feature-based attention in visual cortex. *Trends in neurosciences*,  
640 29(6), 317–322.
- 641 Mitchell, J. F., Sundberg, K. A., & Reynolds, J. H. (2007). Differential attention-dependent response modulation  
642 across cell classes in macaque visual area V4. *Neuron*, 55(1), 131–141.

- 643 Moore, T. & Armstrong, K. M. (2003). Selective gating of visual signals by microstimulation of frontal cortex.  
644 *Nature*, 421(6921), 370–373.
- 645 Müller, M., Andersen, S., Trujillo, N., Valdes-Sosa, P., Malinowski, P., & Hillyard, S. (2006). Feature-selective  
646 attention enhances color signals in early visual areas of the human brain. *Proceedings of the National  
647 Academy of Sciences*, 103(38), 14250–14254.
- 648 Ni, A. M. & Maunsell, J. H. R. (2019). Neuronal effects of spatial and feature attention differ due to normalization.  
649 *J. Neurosci.* 39(28), 5493–5505.
- 650 Noudoost, B., Chang, M. H., Steinmetz, N. A., & Moore, T. (2010). Top-down control of visual attention. *Curr.  
651 Opin. Neurobiol.* 20(2), 183–190.
- 652 Palmer, J., Verghese, P., & Pavel, M. (2000). The psychophysics of visual search. *Vision research*, 40(10-12),  
653 1227–1268.
- 654 Paltoglou, A. E. & Neri, P. (2012). Attentional control of sensory tuning in human visual perception. *Journal of  
655 neurophysiology*, 107(5), 1260–1274.
- 656 Patzwahl, D. R. & Treue, S. [Stefan]. (2009). Combining spatial and feature-based attention within the receptive  
657 field of MT neurons. *Vision Res.* 49(10), 1188–1193.
- 658 Pelli, D. G. (1985). Uncertainty explains many aspects of visual contrast detection and discrimination. *JOSA A*,  
659 2(9), 1508–1532.
- 660 Pestilli, F., Carrasco, M., Heeger, D. J., & Gardner, J. L. (2011). Attentional enhancement via selection and  
661 pooling of early sensory responses in human visual cortex. *Neuron*, 72(5), 832–846.
- 662 Posner, M. I., Snyder, C. R., & Davidson, B. J. (1980). Attention and the detection of signals. *J. Exp. Psychol.*  
663 109(2), 160–174.
- 664 Prinzmetal, W., Amiri, H., Allen, K., & Edwards, T. (1998). Phenomenology of attention: I. color, location,  
665 orientation, and spatial frequency. *Journal of Experimental Psychology: Human Perception and Performance*,  
666 24(1), 261.
- 667 Prinzmetal, W., Nwachuku, I., Bodanski, L., Blumenfeld, L., & Shimizu, N. (1997). The phenomenology of  
668 attention. *Consciousness and cognition*, 6(2-3), 372–412.
- 669 Rahnev, D., Maniscalco, B., Graves, T., Huang, E., de Lange, F. P., & Lau, H. (2011). Attention induces  
670 conservative subjective biases in visual perception. *Nat. Neurosci.* 14(12), 1513–1515.
- 671 Reddy, L., Wilken, P., & Koch, C. (2004). Face-gender discrimination is possible in the near-absence of attention.  
672 *Journal of vision*, 4(2), 4–4.
- 673 Rossi, A. F. & Paradiso, M. A. (1995). Feature-specific effects of selective visual attention. *Vision Res.* 35(5),  
674 621–634.



- 675 Saenz, M., Buracas, G. T., & Boynton, G. M. (2002). Global effects of feature-based attention in human visual  
676 cortex. *Nat. Neurosci.* 5(7), 631–632.
- 677 Saenz, M., Buraças, G. T., & Boynton, G. M. (2003). Global feature-based attention for motion and color. *Vision*  
678 *research*, 43(6), 629–637.
- 679 Schurgin, M. W., Wixted, J. T., & Brady, T. F. (2020). Psychophysical scaling reveals a unified theory of visual  
680 memory strength. *Nature human behaviour*, 1–17.
- 681 Serences, J. T. & Boynton, G. M. (2007). Feature-based attentional modulations in the absence of direct visual  
682 stimulation. *Neuron*, 55(2), 301–312.
- 683 Störmer, V. S., Cohen, M. A., & Alvarez, G. A. (2019). Tuning attention to object categories: Spatially global  
684 effects of attention to faces in visual processing. *J. Cogn. Neurosci.* 31(7), 937–947.
- 685 Taylor, R. & Bays, P. M. (2020). Theory of neural coding predicts an upper bound on estimates of memory  
686 variability. *Psychological Review*.
- 687 Treisman, A. M. & Gelade, G. (1980). A feature-integration theory of attention. *Cognitive psychology*, 12(1),  
688 97–136.
- 689 Treue, S. & Martinez-Trujillo, J. C. [J C]. (1999). Feature-based attention influences motion processing gain in  
690 macaque visual cortex. *Nature*, 399(6736), 575–579.
- 691 Utochkin, I. S. & Brady, T. F. (2020). Individual representations in visual working memory inherit ensemble  
692 properties. *Journal of Experimental Psychology: Human Perception and Performance*, 46(5), 458.
- 693 White, A. L., Rolfs, M., & Carrasco, M. (2015). Stimulus competition mediates the joint effects of spatial and  
694 feature-based attention. *J. Vis.* 15(14), 7.
- 695 Wiesner, S., Baumgart, I. W., & Huang, X. (2020). Spatial arrangement drastically changes the neural repre-  
696 sentation of multiple visual stimuli that compete in more than one feature domain. *J. Neurosci.* 40(9),  
697 1834–1848.
- 698 Wolfe, J. M. (1994). Guided search 2.0 a revised model of visual search. *Psychon. Bull. Rev.* 1(2), 202–238.
- 699 Zhang, W. & Luck, S. J. [Steven J]. (2008). Discrete fixed-resolution representations in visual working memory.  
700 *Nature*, 453(7192), 233–235.
- 701 Zhou, H. & Desimone, R. (2011). Feature-based attention in the frontal eye field and area V4 during visual search.  
702 *Neuron*, 70(6), 1205–1217.
